## RESEARCH ARTICLE

## STEM CELLS AND REGENERATION

# Brain tumor specifies intermediate progenitor cell identity by attenuating $\beta$ -catenin/Armadillo activity

Hideyuki Komori<sup>1</sup>, Qi Xiao<sup>2</sup>, Brooke M. McCartney<sup>3</sup> and Cheng-Yu Lee<sup>1,2,4,\*</sup>

## ABSTRACT

During asymmetric stem cell division, both the daughter stem cell and the presumptive intermediate progenitor cell inherit cytoplasm from their parental stem cell. Thus, proper specification of intermediate progenitor cell identity requires an efficient mechanism to rapidly extinguish the activity of self-renewal factors, but the mechanisms remain unknown in most stem cell lineages. During asymmetric division of a type II neural stem cell (neuroblast) in the *Drosophila* larval brain, the Brain tumor (Brat) protein segregates unequally into the immature intermediate neural progenitor (INP), where it specifies INP identity by attenuating the function of the self-renewal factor Klumpfuss (Klu), but the mechanisms are not understood. Here, we report that Brat specifies INP identity through its N-terminal B-boxes via a novel mechanism that is independent of asymmetric protein segregation. Brat-mediated specification of INP identity is critically dependent on the function of the Wnt destruction complex, which attenuates the activity of  $\beta$ -catenin/Armadillo (Arm) in immature INPs. Aberrantly increasing Arm activity in immature INPs further exacerbates the defects in the specification of INP identity and enhances the supernumerary neuroblast mutant phenotype in *brat* mutant brains. By contrast, reducing Arm activity in immature INPs suppresses supernumerary neuroblast formation in *brat* mutant brains. Finally, reducing Arm activity also strongly suppresses supernumerary neuroblasts induced by overexpression of *klu*. Thus, the Brat-dependent mechanism extinguishes the function of the self-renewal factor Klu in the presumptive intermediate progenitor cell by attenuating Arm activity, balancing stem cell maintenance and progenitor cell specification.

**KEY WORDS:** Apc2, Brain tumor, *Drosophila*, Wnt signaling, Intermediate progenitor cell, Neuroblast

## INTRODUCTION

Tissue-specific stem cells often undergo asymmetric cell division to self-renew and to generate an intermediate progenitor cell, which possesses limited developmental potential and functions to generate differentiated cell types (Ming and Song, 2011; Pierfelice et al., 2011; Weng and Lee, 2011; Homem and Knoblich, 2012). Thus, an efficient mechanism to abrogate the activity of self-renewal factors in the presumptive intermediate progenitor cell is pivotal for the maintenance of stem cell homeostasis and the generation of the

requisite number of differentiated progeny. Failure to attenuate the function of self-renewal factors may contribute to the creation of tumor-initiating cells (Krivtsov et al., 2006; Wei et al., 2008; Liu et al., 2011; Haenfler et al., 2012; Xiao et al., 2012; Schwitalla et al., 2013). Thus, understanding the mechanisms that extinguish the activity of self-renewal factors in the presumptive intermediate progenitor cell is likely to provide novel insight into both normal development and tumor initiation.

The type II neuroblast lineage in the fly larval brain provides an excellent model for investigating the mechanisms that regulate the proper specification of intermediate progenitor cell identity *in vivo* (Bayraktar et al., 2010; Weng et al., 2010; Song and Lu, 2011; Haenfler et al., 2012; Xiao et al., 2012). A type II neuroblast can be unambiguously identified by the presence of Deadpan (Dpn) and the absence of Asense (Ase) expression ( $Dpn^+ Ase^-$ ) (Bowman et al., 2008). Type II neuroblasts undergo repeated asymmetric cell division to self-renew and to generate early stage immature intermediate neural progenitors (INPs) ( $Dpn^- Ase^-$ ) that mature into late stage immature INPs ( $Dpn^- Ase^+$ ) (Bello et al., 2008; Boone and Doe, 2008; Bowman et al., 2008; Bayraktar et al., 2010; Xiao et al., 2012). These late stage immature INPs acquire the functional identity of an INP ( $Dpn^+ Ase^+$ ) and subsequently undergo limited rounds of asymmetric division to generate differentiated progeny. Thus, understanding the mechanisms that specify INP identity in immature INPs will provide insight into the proper specification of intermediate progenitor cell identity.

TRIM32 and TRIM3, which are vertebrate orthologs of *Drosophila* Brain tumor (Brat), have been shown to play important roles in regulating neural stem cells during normal brain development and brain tumor formation (Boulay et al., 2009; Schwamborn et al., 2009). Brat contains two B-boxes and a coiled-coil domain in the N-terminus and an NHL domain in the C-terminus (Arama et al., 2000). The NHL domain is essential for Brat function in various developmental processes, including repression of mRNA translation and regulation of microRNA (Sonoda and Wharton, 2001; Neumüller et al., 2008; Harris et al., 2011). In mitotic neuroblasts, the NHL domain mediates the binding of Brat to the scaffolding protein Miranda (Mira), which partitions Brat exclusively into the progenitor cell (Betschinger et al., 2006; Lee et al., 2006a). Most of the previously isolated *brat* mutant alleles carry mutations in the NHL domain and exhibit defects in the maturation of immature INPs, leading to the formation of supernumerary type II neuroblasts (Arama et al., 2000; Bowman et al., 2008; Xiao et al., 2012). However, it is unclear whether the NHL domain contributes to the specification of INP identity directly or indirectly by promoting Brat protein accumulation in immature INPs.

The activation of Wnt signaling plays crucial roles in both the regulation of stem cell self-renewal and the generation of differentiated cells (Merrill, 2012; Habib et al., 2013). In the absence of Wnt ligand, Wnt signaling is negatively regulated by the destruction complex, which includes the kinases GSK3 $\beta$  and CK1,

<sup>1</sup>Center for Stem Cell Biology, Life Sciences Institute, University of Michigan, Ann Arbor, MI 48109, USA. <sup>2</sup>Department of Cell and Developmental Biology, University of Michigan Medical School, Ann Arbor, MI 48109, USA. <sup>3</sup>Department of Biological Sciences, Carnegie Mellon University, Pittsburgh, PA 15213, USA. <sup>4</sup>Division of Molecular Medicine and Genetics, Department of Internal Medicine, University of Michigan Medical School, Ann Arbor, MI 48109, USA.

\*Author for correspondence (leecheng@umich.edu)

the scaffolding protein Axin, and the tumor suppressor Adenomatous polyposis coli (Apc) (Aoki and Taketo, 2007; MacDonald et al., 2009; Niehrs, 2012). This destruction complex phosphorylates  $\beta$ -catenin/Armadillo (Arm) and targets it for proteosomal degradation. Binding of the Wnt ligand to the Frizzled receptor inactivates the destruction complex, leading to the accumulation and nuclear translocation of  $\beta$ -catenin/Arm, where it complexes with Tcf/LEF family transcription factors and activates Wnt target gene expression. Despite its essential roles in regulating stem cell self-renewal and, ultimately, the generation of differentiated cells, little is known about the role of Wnt signaling in the specification of progenitor cell identity. Previous studies revealed that *Drosophila* Apc2 is cortically enriched asymmetrically in larval brain neuroblasts, such that a portion of the Apc2 is partitioned into the progenitor cell (McCartney et al., 1999). Furthermore, Apc2 becomes enriched in the cortex of the progenitor cell following neuroblast asymmetric division, suggesting that Wnt signaling activity might be negatively regulated in the progenitor cell (Akong et al., 2002). However, the functional significance of Wnt signaling in the progenitor cell has never been established.

Here, we report that Brat specifies INP identity in immature INPs by downregulating Arm via a novel mechanism that is separable from the mechanism that regulates the asymmetric segregation of Brat. We identified that the B-boxes are dispensable for asymmetric partitioning of Brat into the presumptive immature INP but are necessary for Brat-dependent specification of INP identity. We further demonstrated that proper specification of INP identity by the Brat-mediated mechanism is critically dependent on Apc2, a key destruction complex component. Consistent with Apc2 negatively

regulating Arm, reducing the function of the destruction complex or overexpressing constitutively active Arm enhances the supernumerary neuroblast phenotype in *brat* hypomorphic mutant brains. Furthermore, reducing *arm* function in immature INPs suppresses the supernumerary neuroblast phenotype in *brat* hypomorphic mutant brains, whereas increasing *arm* function in immature INPs strongly enhances the supernumerary neuroblast phenotype. These data strongly suggest that Brat specifies INP identity in immature INPs by attenuating the function of Arm through the destruction complex, thereby preventing the activation of Wnt target. Finally, removing *arm* function also strongly suppresses the supernumerary neuroblast phenotype induced by overexpression of the self-renewal factor Klumpfuss (Klu). Thus, Brat specifies INP identity in immature INPs by attenuating the function of the self-renewal factor Klu in part through extinguishing the transcriptional activity of Arm.

## RESULTS

### The B-boxes of Brat are dispensable for asymmetric protein segregation

Since Brat unequally partitions into the immature INP following the asymmetric division of neuroblasts, the domains required for the asymmetric segregation of Brat are also likely to function to promote the specification of INP identity. We identified the domains required for asymmetric segregation of Brat in mitotic neuroblasts in *brat* null mutant brains by overexpressing a series of *UAS-brat* transgenes inserted into an identical docking site in the fly genome (Fig. 1A). Brat always colocalized with Mira in the basal cortex of telophase neuroblasts and co-segregated with Mira exclusively into

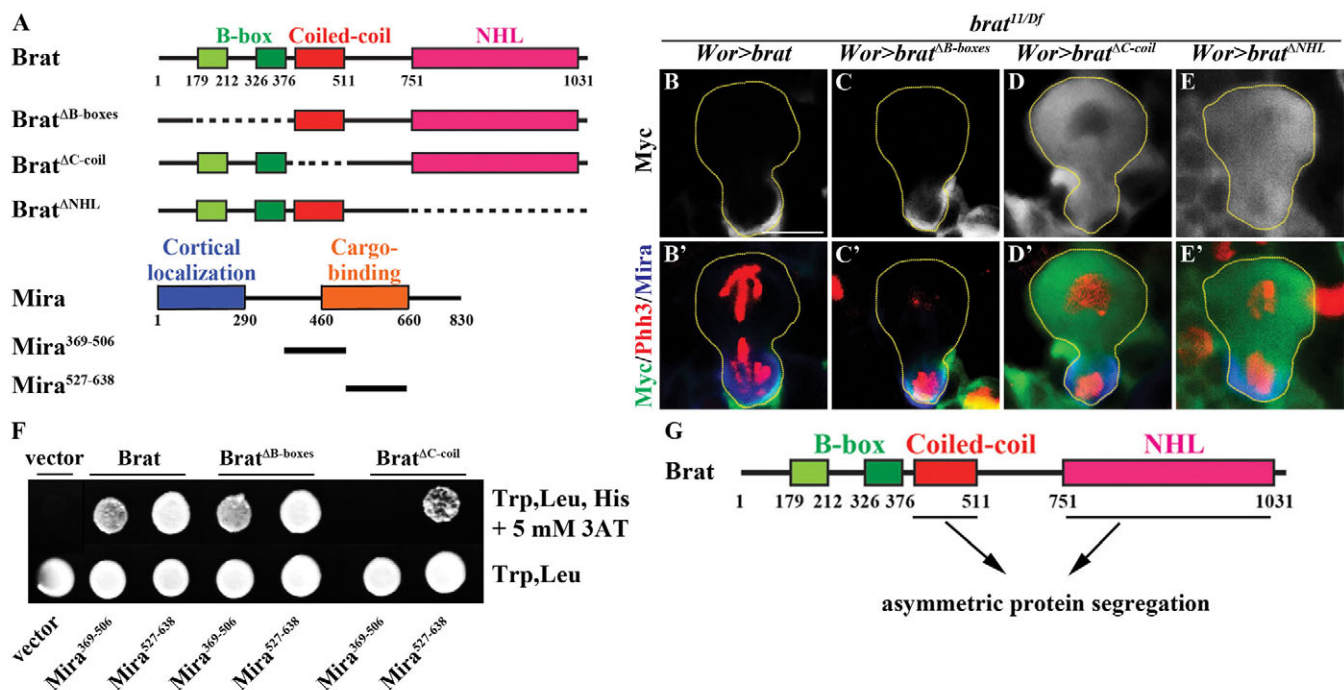

**Fig. 1. The coiled-coil domain and the NHL domain are both required to promote the asymmetric segregation of Brat in mitotic neuroblasts.**

(A) Schematics of Brat and the Brat deletion mutants used to identify the domain required to asymmetrically segregate Brat in mitotic neuroblasts in transgenic *Drosophila* and to map the Mira-binding domain in yeast two-hybrid analysis. Dashed lines indicate deletions. (B-C') Brat and Brat<sup>ΔB-boxes</sup> are cortically localized and segregate asymmetrically into the future immature INP in mitotic type II neuroblasts in *brat* null brains. (D-E') Deletion of either the coiled-coil or the NHL domain (Brat<sup>ΔC-coil</sup> or Brat<sup>ΔNHL</sup>) results in cytoplasmic localization and symmetric segregation into both daughter progeny. All Brat transgenic proteins are Myc tagged. The segregation pattern of the Brat transgenic proteins was determined based on the colocalization of the Myc epitope and Mira in telophase neuroblasts. *Wor* is a neuroblast-specific driver. Phh3, phosphohistone H3. (F) Yeast two-hybrid analysis showing that Brat and Brat<sup>ΔB-boxes</sup> interact with both Mira<sup>369-506</sup> and Mira<sup>527-638</sup>, but Brat<sup>ΔC-coil</sup> only interacts with Mira<sup>527-638</sup>. (G) Summary of the domains required for segregating Brat uniquely into the future immature INP during the asymmetric division of neuroblasts. Scale bar: 5  $\mu$ m.

the future progenitor cell (Fig. 1B; 100%,  $N=12$ ). Brat<sup>AB-boxes</sup> also colocalized with Mira in telophase neuroblasts and co-segregated with Mira asymmetrically into the future progenitor cell (Fig. 1C; 60%,  $N=12$ ). Thus, the B-boxes are dispensable for unequal partitioning of Brat during the asymmetric division of neuroblasts. By contrast, Brat<sup>ANHL</sup> and Brat<sup>AC-coil</sup> never colocalized with Mira in telophase neuroblasts and always segregated symmetrically into the cytoplasm of both daughter cells (Fig. 1D,E; 100%,  $N=12$  per genotype). These results indicate that the NHL domain and the coiled-coil domain are essential for the asymmetric segregation of Brat in mitotic neuroblasts.

The binding of Brat to the cargo-binding domain of Mira (amino acids 405–830) is essential for its segregation into the future progenitor cell following the asymmetric division of neuroblasts (Betschinger et al., 2006; Lee et al., 2006a). Independently of our domain analyses, we identified that Mira<sup>369–506</sup> and Mira<sup>527–638</sup> (Fig. 1A) bind to both full-length Brat and Brat<sup>AB-boxes</sup> in a yeast two-hybrid screen using a *brat* mutant brain cDNA library (H.K. and C.-Y.L., unpublished). We confirmed the interaction between full-length Brat or Brat<sup>AB-boxes</sup> with both the Mira<sup>369–506</sup> and Mira<sup>527–638</sup> fragments in a one-to-one yeast two-hybrid interaction assay (Fig. 1F). These results indicate that the B-boxes are dispensable for the binding of Brat to Mira, consistent with Brat<sup>AB-boxes</sup> colocalizing and co-segregating with Mira into the immature INP during the asymmetric division of neuroblasts (Fig. 1C). We next tested whether the coiled-coil domain of Brat mediates direct interaction with Mira<sup>369–506</sup> or Mira<sup>527–638</sup>. Interestingly, Brat<sup>AC-coil</sup> only interacts with Mira<sup>527–638</sup> but not with the Mira<sup>369–506</sup> fragment, indicating that the coiled-coil domain of Brat mediates the binding to amino acids 369–506 of Mira (Fig. 1F). These data also suggest that the NHL domain most likely interacts with amino acids 527–638 of Mira and are consistent with our previous study showing that glycine 774 and tyrosine 829 in the NHL domain of Brat mediate direct interaction with the cargo-binding domain of Mira (Lee et al., 2006a). We were unable to directly test the interaction between Brat<sup>ANHL</sup> and Mira<sup>527–638</sup> due to excessive auto-activation. Taken together, we propose that the coiled-coil domain and the NHL domain function cooperatively to target Brat into the future progenitor cell during the asymmetric division of type II neuroblasts.

### The B-boxes of Brat are uniquely required for the specification of INP identity

We next tested whether the coiled-coil domain or the NHL domain is required for Brat-dependent specification of INP identity by overexpressing the *UAS-brat* transgene driven by a neuroblast-specific *Wor-Gal4* driver in *brat* null brains (Fig. 1A, Fig. 2A). We previously showed that Ase<sup>−</sup> immature INPs rapidly revert into supernumerary type II neuroblasts at the expense of INP formation in *brat* null brains (Fig. 2B,C,I; supplementary material Fig. S1A) (Xiao et al., 2012). Overexpression of *brat* suppressed the supernumerary neuroblast phenotype and restored INP formation in *brat* null brains (Fig. 2D,I; supplementary material Fig. S1B,C;  $N=10$ ). Thus, restoring wild-type *brat* function in type II neuroblasts is sufficient to rescue defects in the specification of INP identity in *brat* null brains. Surprisingly, overexpression of *brat*<sup>AC-coil</sup> or *brat*<sup>ANHL</sup> also suppressed the supernumerary neuroblast phenotype in *brat* null brains (Fig. 2E,F,I; supplementary material Fig. S1D,E;  $N=10$  per genotype). These results indicate that neither the coiled-coil domain nor the NHL domain is essential for Brat-dependent specification of INP identity. By contrast, overexpression of *brat*<sup>AB-boxes</sup> failed to suppress the supernumerary neuroblast phenotype in *brat* null brains (Fig. 2G,I; supplementary material Fig. S1F,G;

$N=10$  per genotype). Thus, the B-boxes are indispensable for Brat-dependent specification of INP identity. Because the Brat protein has two B-boxes, we tested whether they might function redundantly to mediate Brat-dependent specification of INP identity. Overexpression of either *brat*<sup>AB-box 1</sup> or *brat*<sup>AB-box 2</sup> efficiently suppressed the supernumerary neuroblast phenotype and restored INP formation in *brat* null brains (Fig. 2H,I;  $N=10$ ; data not shown). These data indicate that the B-boxes indeed function redundantly to mediate Brat-dependent specification of INP identity (Fig. 2J).

Although all TRIM family proteins contain at least one B-box, the role of this domain in the function of these proteins is unknown. We tested whether the B-boxes might mediate the function of Brat in repressing the translation of *hunchback* mRNA in the posterior of the preblastoderm embryo (Sonoda and Wharton, 2001). We overexpressed *UAS-brat* transgenes driven by *nanos-Gal4* in *brat*<sup>fs1/Df</sup> mutant embryos. Consistent with previously published observations, overexpression of *brat*, but not *brat*<sup>ANHL</sup>, rescued defects in abdominal segmentation in *brat*<sup>fs1/Df</sup> embryos (supplementary material Fig. S1H–J). Importantly, overexpression of *brat*<sup>AB-boxes</sup> or *brat*<sup>AC-coil</sup> also rescued defects in abdominal segmentation in *brat*<sup>fs1/Df</sup> embryos (supplementary material Fig. S1K–M). Thus, the B-boxes and the coiled-coil domain are dispensable for the function of Brat in repressing mRNA translation. The B-boxes, therefore, uniquely elicit the function of Brat in the specification of INP identity (Fig. 2J).

### The mechanism by which Brat specifies INP identity is sensitive to reduced Apc2 function

Our data thus far indicate that Brat specifies INP identity via a novel mechanism that is independent of the domains required for asymmetric protein segregation (Figs 1, 2). To gain mechanistic insight into how Brat specifies INP identity, we screened for haploinsufficient loci that modify the supernumerary neuroblast phenotype in a sensitized *brat* mutant background (Xiao et al., 2012). Briefly, a wild-type larval brain lobe contained  $8\pm0$  type II neuroblasts (data not shown). Whereas a hypomorphic *brat*<sup>DG19310/11</sup> homozygous mutant brain lobe possessed  $12\pm3$  type II neuroblasts (supplementary material Fig. S2A,B;  $N=10$ ), a genetically null *brat*<sup>11/K06028</sup> mutant brain lobe contained hundreds of type II neuroblasts (supplementary material Fig. S2A,C;  $N=10$ ). A *brat*<sup>DG19310/11</sup> mutant brain lobe possessed  $24.5\pm4.7$  type II neuroblasts and provides a sensitized genetic background for identifying the genetic modifiers of *brat* (Fig. 3A; supplementary material Fig. S2A;  $N=10$ ). Through this screen, we identified *Apc2* as a genetic enhancer of the supernumerary neuroblast phenotype in *brat*<sup>DG19310/11</sup> mutant brains. We confirmed that reducing *Apc2* function consistently enhanced the supernumerary neuroblast phenotype in *brat*<sup>DG19310/11</sup> brains using multiple independently generated *Apc2* mutant alleles, including a null allele [*Apc2*<sup>g<sup>10</sup></sup>] (McCartney et al., 2006)] and two hypomorphic alleles [*Apc2*<sup>N175K</sup> and *Apc2*<sup>d40</sup>] (McCartney et al., 2001; Hamada and Bienz, 2002)] (Fig. 3B; supplementary material Fig. S2A,D,E;  $N=10$  per genotype). Furthermore, overexpression of *Apc2* rescued the enhancement of the supernumerary neuroblast phenotype in *brat*<sup>DG19310/11</sup> mutant brains induced by the heterozygosity of *Apc2* (Fig. 3C;  $N=10$ ). Thus, reduced *Apc2* function enhances the supernumerary neuroblast phenotype in *brat*<sup>DG19310/11</sup> brains. Despite sharing extensive sequence homology and functional redundancy with *Apc2* (Ahmed et al., 2002; Akong et al., 2002; Hamada and Bienz, 2002), reducing *Apc1* (*Apc* – FlyBase) did not enhance the supernumerary neuroblast phenotype in *brat*<sup>DG19310/11</sup> mutant brains (supplementary material Fig. S2A,F;  $N=10$ ). In addition, reducing



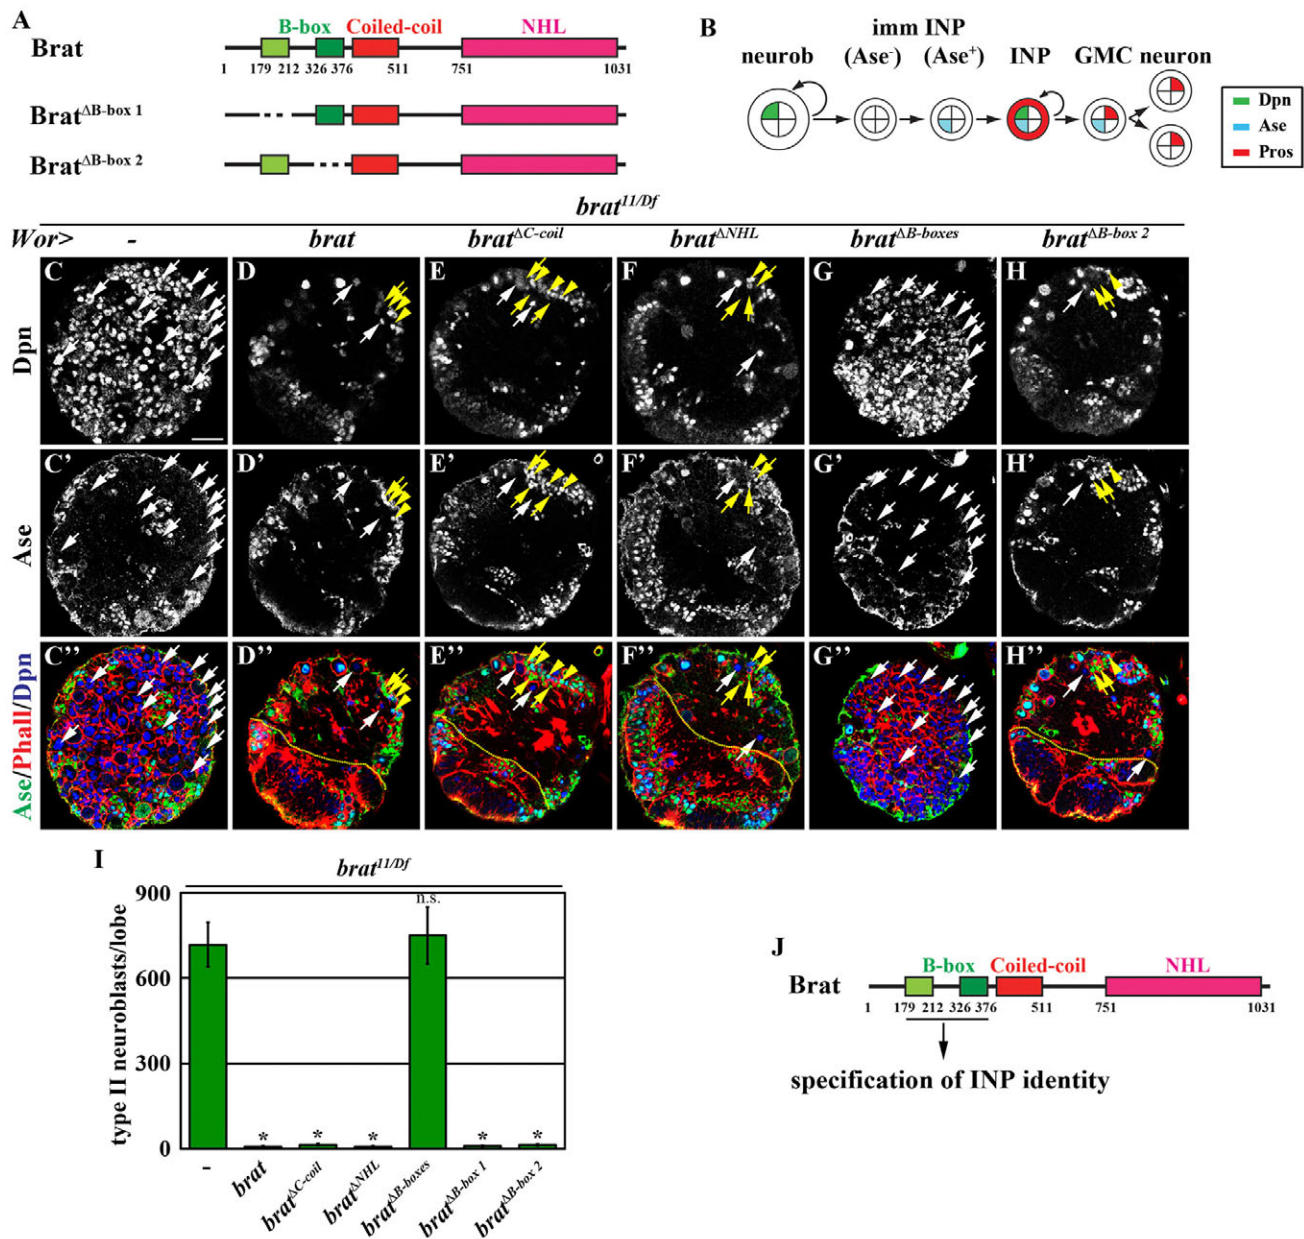

**Fig. 2. The B-boxes of Brat function uniquely in the specification of INP identity.** (A) Summary of the *UAS-brat* transgenes used to test for B-box redundancy in the rescue of supernumerary neuroblasts in *brat* null brains. (B) Summary of the cell types in the type II neuroblast lineage in the *Drosophila* larval brain. Dpn, Deadpan; Ase, Asense; Pros, Prospero; GMC, ganglion mother cell; INP, intermediate neural progenitor; imm INP, immature INP; neurob, neuroblast. (C-H'') Overexpression of full-length *brat*, *brat*<sup>ΔC-coil</sup>, *brat*<sup>ΔNHL</sup> or *brat*<sup>ΔB-box 2</sup> rescues the supernumerary neuroblast phenotype in *brat* null brains, but overexpression of *brat*<sup>ΔB-boxes</sup> does not. The effects on the supernumerary neuroblast phenotype in *brat* mutant brains were determined based on total type II neuroblasts per brain lobe. The dotted line separates the brain from the optic lobe where both are visible in the optical section. White arrows, type II neuroblasts (Dpn<sup>+</sup> Ase<sup>-</sup>); yellow arrows, Ase<sup>-</sup> immature INPs (Dpn<sup>-</sup> Ase<sup>-</sup>) and Ase<sup>+</sup> immature INPs (Dpn<sup>-</sup> Ase<sup>+</sup>); yellow arrowheads, INPs (Dpn<sup>+</sup> Ase<sup>+</sup>). (I) Quantification of total type II neuroblasts per brain lobe in *brat* mutant brains overexpressing various *Brat* transgenic proteins. Error bars indicate standard deviation of the mean (s.d.). \**P* < 0.05 versus control (Student's *t*-test). (J) Summary of the domain required for Brat-dependent specification of INP identity. Scale bar: 20 μm.

*Apc1* did not significantly worsen the supernumerary neuroblast phenotype in *brat*<sup>DG19310/11</sup> brains induced by the heterozygosity of *Apc2* (supplementary material Fig. S2A,G,H; *N*=10 per genotype). Lack of effect of reducing *Apc1* function on the supernumerary neuroblast phenotype in *brat*<sup>DG19310/11</sup> mutant brains might be due to the differential expression patterns of *Apc1* and *Apc2* in the developing larval brain (Akong et al., 2002). Together, these data strongly suggest that Brat specifies INP identity via an Apc2-dependent mechanism.

Interestingly, neither the overexpression of *Apc2* nor the removal of *Apc2* function perturbed the identity of progeny generated by type II neuroblasts in an otherwise wild-type background (data not shown). Thus, we hypothesized that Apc2 regulates the specification of INP identity in a Brat-dependent context. Consistent with previous reports (McCartney et al., 1999; Akong et al., 2002), Apc2 was detected in both the cortex and cytoplasm of interphase type II neuroblasts and became enriched in the basal cortex of mitotic neuroblasts in wild-type brains (Fig. 3D,E; *N*=10 per experiment), such that Apc2 is

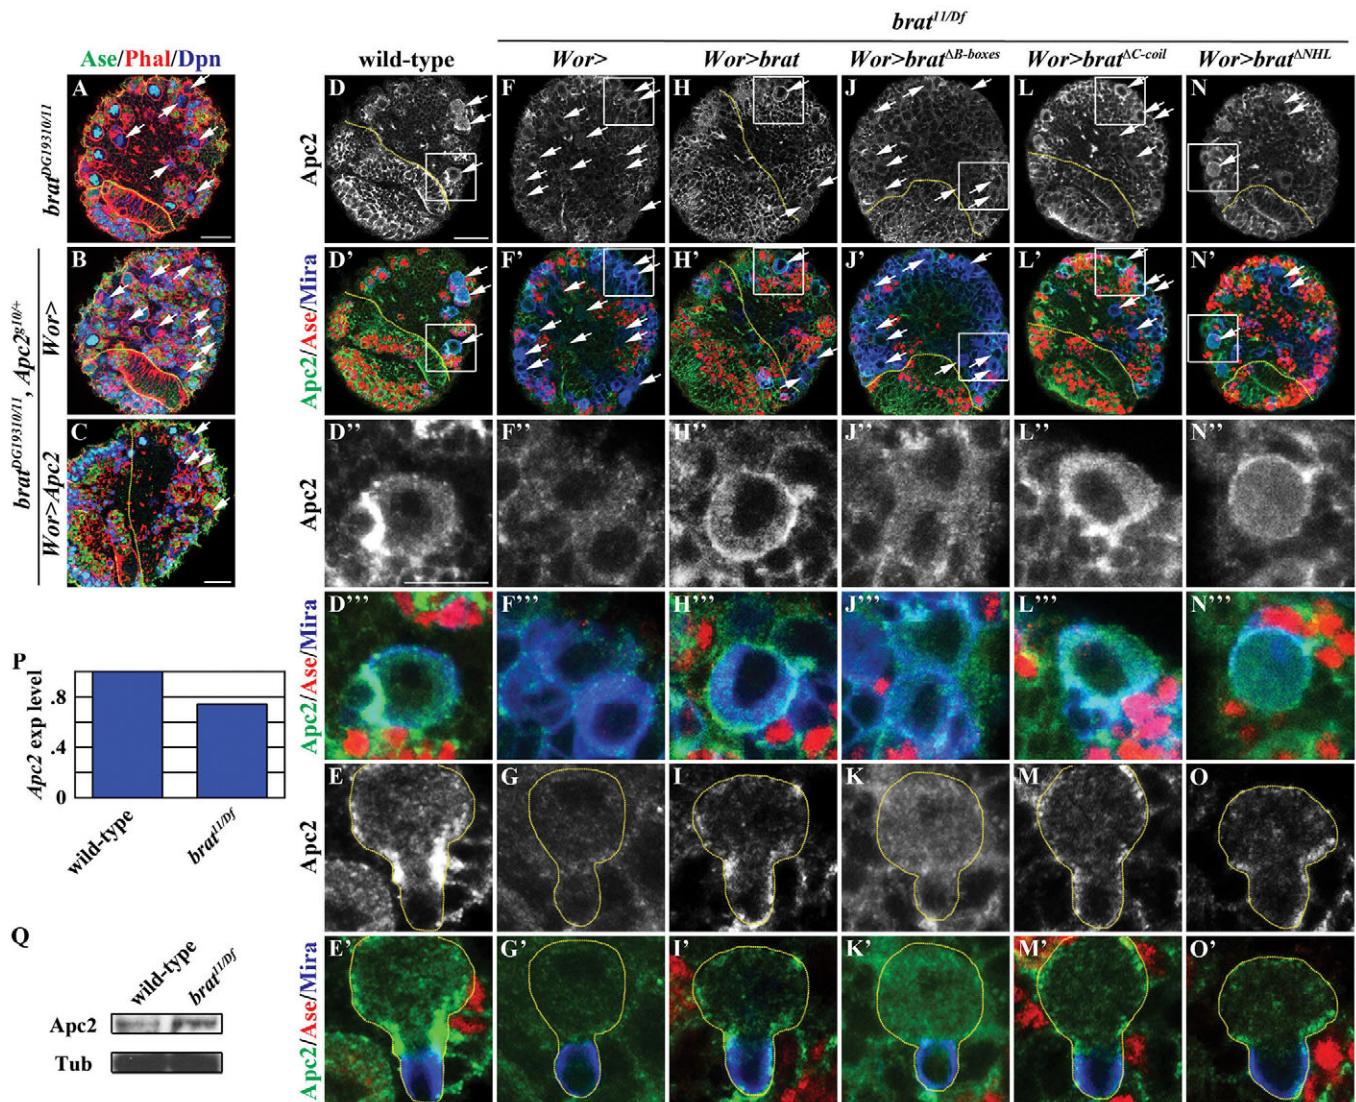

**Fig. 3. Brat specifies INP identity by maintaining Apc2 cortical localization.** (A,B) Reduced *Apc2* function enhances the supernumerary neuroblast phenotype in *brat* mutant brains. (C) Increased *Apc2* expression rescues the enhancement of the supernumerary neuroblast phenotype in *brat* mutant brains induced by *Apc2* heterozygosity. (D-O') Overexpression of full-length *brat*, *brat*<sup>ΔC-coil</sup> and *brat*<sup>ΔNHL</sup>, but not *brat*<sup>ΔB-boxes</sup>, restores Apc2 localization in interphase type II neuroblasts in *brat* mutant brains. (F,H,J,L,N) The expression pattern of Apc2 in type II neuroblasts in *brat* mutant brains. (G,I,K,M,O) The localization pattern of Apc2 in telophase type II neuroblasts (Mira<sup>+</sup> Ase<sup>-</sup>) in *brat* mutant brains. Boxed regions in D-N' are magnified in D''-N''. See Fig. 2 for description of labels. (P,Q) Quantitative analyses of the level of Apc2 mRNA (P) and Apc2 protein (Q) in *brat* mutant brains. α-tubulin (Tub) provides a loading control. Scale bars: 20 μm in A-C; 10 μm in D-N'; 5 μm in D''-O'.

partitioned into both daughters. However, the expression and the cortical localization of Apc2 were dramatically reduced in type II neuroblasts in *brat* null mutant brains (Fig. 3F,G; *N*=10 per experiment). Importantly, overexpression of full-length *brat* restored Apc2 protein expression and cortical localization in *brat* null type II neuroblasts (Fig. 3H,I; *N*=10 per experiment). These data strongly suggest that Brat specifies INP identity by maintaining Apc2 protein expression and/or cortical localization. Because the B-boxes function uniquely to elicit Brat-dependent specification of INP identity, we tested whether overexpression of *brat*<sup>ΔB-boxes</sup> can restore Apc2 protein expression and/or cortical localization in *brat* null neuroblasts. Consistent with its inability to suppress the supernumerary neuroblast phenotype in *brat* null brains, overexpressing *brat*<sup>ΔB-boxes</sup> failed to restore Apc2 protein expression and cortical localization in *brat* mutant type II neuroblasts (Fig. 3J,K; *N*=10 per experiment). By contrast, overexpression of *brat*<sup>ΔC-coil</sup> or *brat*<sup>ΔNHL</sup> efficiently restored

Apc2 protein expression and cortical localization in *brat* null mutant type II neuroblasts (Fig. 3L-O; *N*=10 per experiment). Thus, Brat specifies INP identity by maintaining Apc2 protein expression and/or cortical localization through the B-boxes.

We tested whether Brat directly regulates the expression of the *Apc2* gene. Although we detected a ~30% reduction in the level of *Apc2* transcript in extracts from dissected *brat* null brains compared with wild-type larval brains, there was no appreciable difference in the level of Apc2 protein (Fig. 3P,Q). Hence, it is most likely that Brat specifies INP identity by maintaining Apc2 cortical localization rather than by regulating Apc2 protein expression.

#### Brat specifies INP identity via a novel Arm-sensitive mechanism

Apc2 together with Axin, Gsk3β [Shaggy (Sgg)] and Casein kinase Ia (CKI) form the destruction complex that targets β-catenin/Arm



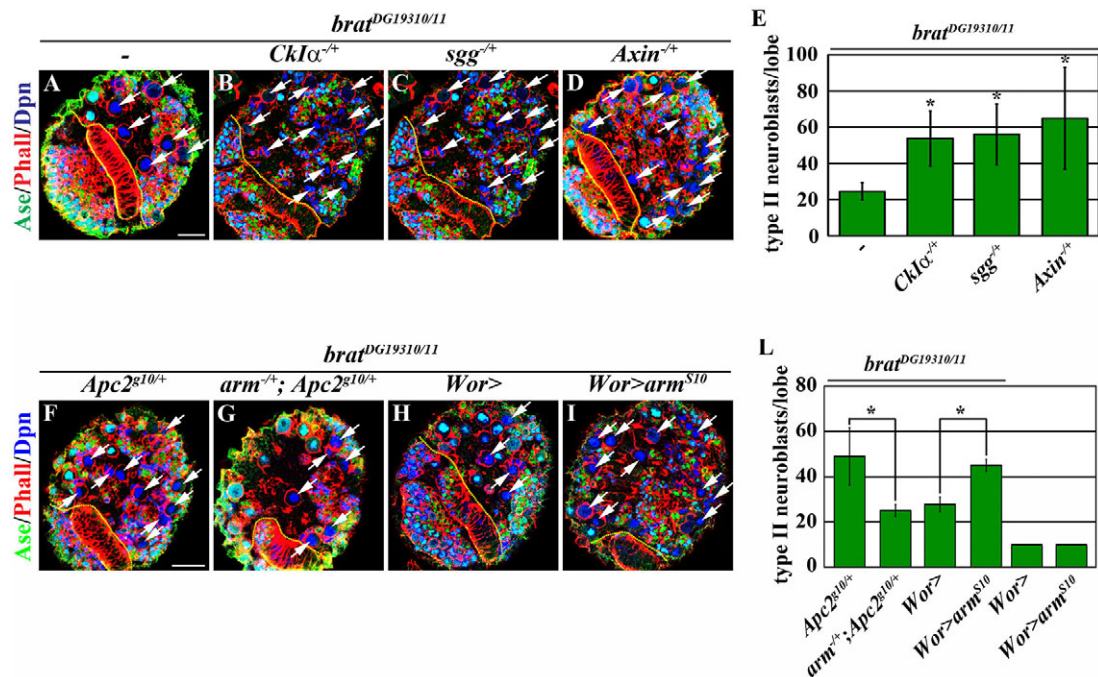

**Fig. 4. Increased Arm function enhances supernumerary neuroblast formation in *brat* mutant brains.** (A-D) Like *Apc2*, increasing Arm activity by reducing the function of other components of the destruction complex enhances the supernumerary neuroblast phenotype in *brat* mutant brains. See Fig. 2 for description of labels. (E) Quantification of total type II neuroblasts per brain lobe in *brat* mutant brains. (F-I) The supernumerary neuroblast phenotype in *brat* mutant brains is sensitive to changes in *arm* function. (F,G) Reduced *arm* function suppresses the enhancement of the supernumerary neuroblast phenotype in *brat* mutant brains induced by the heterozygosity of *Apc2*. (H,I) Increased *arm* function enhances the supernumerary neuroblast phenotype in *brat* mutant brains. (J) Quantification of total type II neuroblasts per brain lobe in *brat* mutant brains. \**P*<0.05 versus control (Student's *t*-test). Error bars indicate s.d. Scale bars: 20  $\mu$ m.

for degradation in the absence of Wnt pathway activation (Aoki and Taketo, 2007; MacDonald et al., 2009; Niehrs, 2012). Loss of *Apc2* reduces destruction complex activity, leading to elevation of the Arm levels and activation of Wnt target genes (McCartney et al., 1999). We tested if reduced function of the destruction complex can indeed enhance the supernumerary neuroblast phenotype in *brat*<sup>DG19310/11</sup> mutant brains. Similar to the effect of reduced *Apc2* function, heterozygosity of *Axin*, *sgg* or *CKI* enhanced the supernumerary neuroblast phenotype in *brat*<sup>DG19310/11</sup> brains (Fig. 4A-E; *N*=10 per genotype). Hence, reduced function of the destruction complex enhances the supernumerary neuroblast phenotype in *brat* mutant brains.

We next tested whether increased Arm activity contributes to the enhancement of the supernumerary neuroblast phenotype in *brat*<sup>DG19310/11</sup> mutant brains induced by heterozygosity of *Apc2*. Indeed, reducing the function of *arm* suppressed the enhancement of the supernumerary neuroblast phenotype in *brat*<sup>DG19310/11</sup> brains heterozygous for *Apc2* (Fig. 4F,G; *N*=10 per genotype). Consistent with this finding, overexpression of *arm*<sup>S10</sup>, which encodes a stabilized form of Arm that is refractory to destruction complex activity (Pai et al., 1997), strongly enhanced the supernumerary neuroblast phenotype in *brat*<sup>DG19310/11</sup> mutant brains (Fig. 4H,I; *N*=10 per genotype). Unexpectedly, overexpression of *arm*<sup>S10</sup> alone was not sufficient to induce supernumerary neuroblasts in wild-type brains (Fig. 4J; *N*=10 per genotype). Thus, Brat specifies INP identity by attenuating the activity of Arm via a destruction complex-dependent mechanism. These results also indicate that increased Arm activity induces supernumerary neuroblasts in a manner that is dependent upon a parallel mechanism that acts downstream of Brat.

#### Brat specifies INP identity in immature INPs by attenuating the transcriptional activity of Arm

Our previous study strongly suggests that Brat specifies INP identity in Ase<sup>-</sup> immature INPs (Xiao et al., 2012), prompting us to test whether Brat attenuates Arm activity specifically in Ase<sup>-</sup> immature INPs. Consistent with this model, overexpression of *Apc2* in either neuroblasts or Ase<sup>-</sup> immature INPs [using *Erm-Gal4(II)*] suppressed the enhancement of the supernumerary neuroblast phenotype in *brat*<sup>DG19310/11</sup> mutant brains induced by heterozygosity of *Apc2* (Fig. 5A-D; *N*=10 per genotype). By contrast, overexpression of *Apc2* in Ase<sup>+</sup> immature INPs [using *Erm-Gal4(III)*] did not have any effect on the enhancement of the supernumerary neuroblast phenotype in *brat*<sup>DG19310/11</sup> brains induced by *Apc2* heterozygosity (Fig. 5E,F; *N*=10). Furthermore, overexpression of *arm*<sup>S10</sup> in neuroblasts or Ase<sup>-</sup> immature INPs also enhanced the supernumerary neuroblast phenotype in *brat*<sup>DG19310/11</sup> mutant brains, whereas overexpression of *arm*<sup>S10</sup> in Ase<sup>+</sup> immature INPs did not (Fig. 5G-K; *N*=10 per genotype). Together, these results strongly suggest that Brat specifies INP identity in Ase<sup>-</sup> immature INPs by attenuating Arm activity through the destruction complex.

During canonical Wnt signaling,  $\beta$ -catenin/Arm forms a transcriptional activator complex by binding to Tcf and activates Wnt target gene expression (Aoki and Taketo, 2007; MacDonald et al., 2009; Niehrs, 2012). We tested whether Brat specifies INP identity in Ase<sup>-</sup> immature INPs by attenuating the transcriptional activator function of Arm. Reducing the function of *arm* suppressed the supernumerary neuroblast phenotype in *brat*<sup>DG19310/11</sup> mutant brains (Fig. 5L,M; *N*=10 per genotype). Similarly, overexpression of *Tcf*<sup>DN</sup>, which encodes a dominant-negative form of Tcf (Pangolin

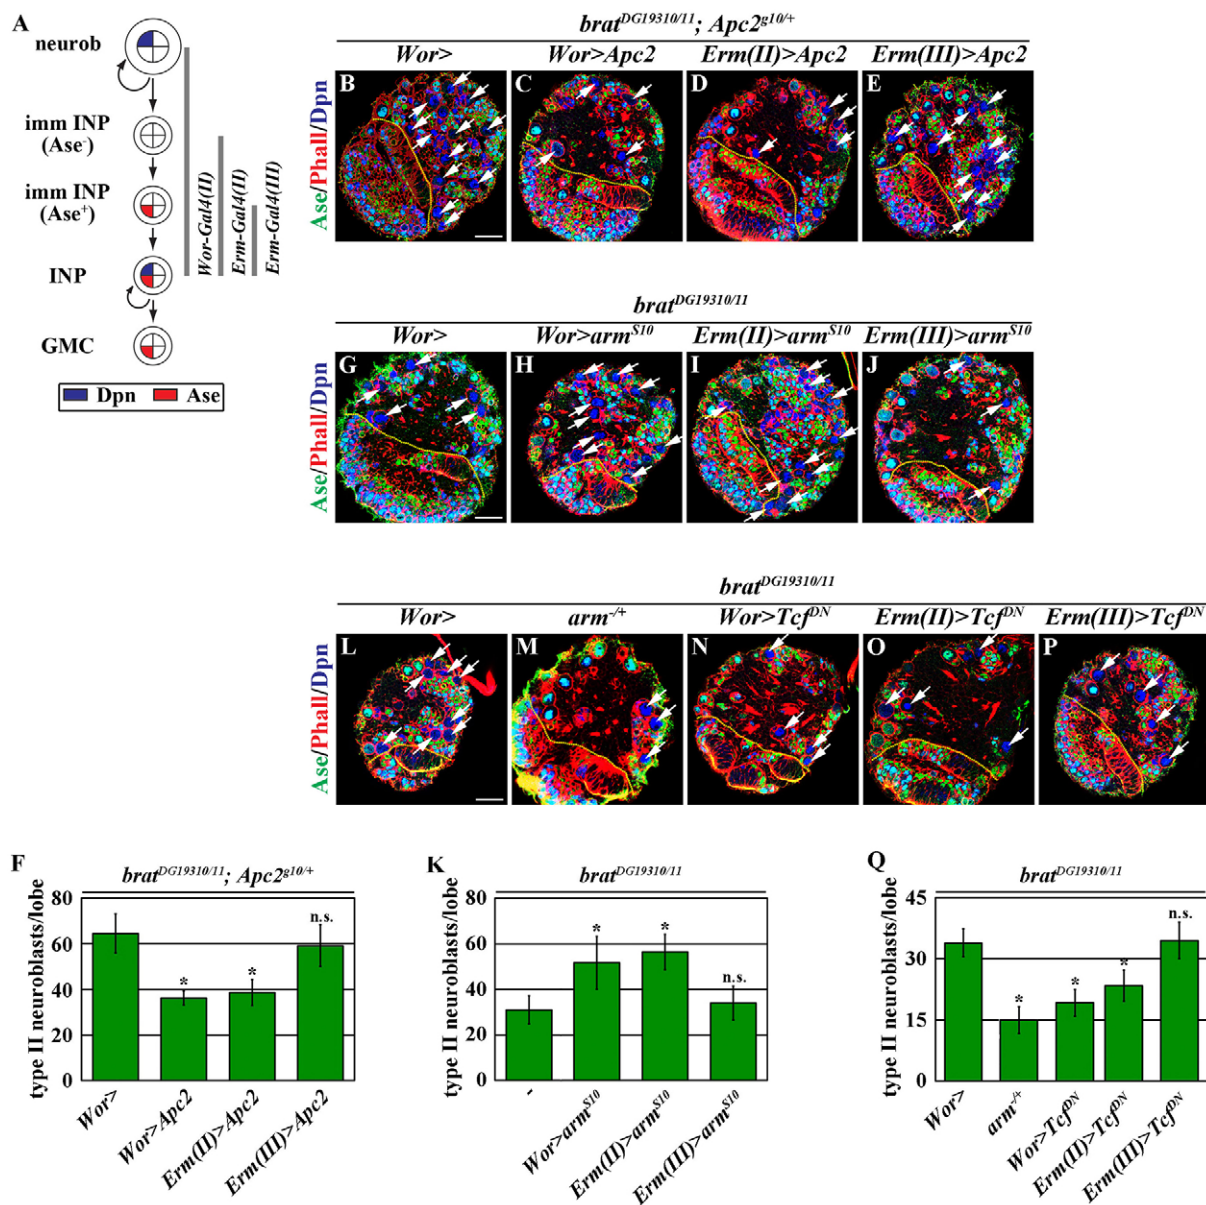

**Fig. 5. Brat specifies INP identity by antagonizing Arm-dependent gene transcription in immature INPs.** (A) Summary of the expression patterns of the *Gal4* drivers within the type II neuroblast lineage (Xiao et al., 2012). (B-E) Increased function of *Apc2* early in the lineage suppresses the enhancement of the supernumerary neuroblast phenotype in *brat* mutant brains induced by *Apc2* heterozygosity. (F) Quantification of total type II neuroblasts per brain lobe in *brat* mutant brains. (G-J) Increased function of *arm* early in the lineage enhances the supernumerary neuroblast phenotype in *brat* mutant brains. (K) Quantification of total type II neuroblasts per brain lobe in *brat* mutant brains. (L-P) Decreased *arm* function via *arm* gene heterozygosity or overexpression of *Tcf<sup>DN</sup>* in type II neuroblasts or Ase<sup>-</sup> immature INPs suppresses the supernumerary neuroblast phenotype in *brat* mutant brains. By contrast, overexpression of *Tcf<sup>DN</sup>* in Ase<sup>+</sup> immature INPs does not suppress the supernumerary neuroblast phenotype in *brat* mutant brains. (Q) Quantification of total type II neuroblasts per brain lobe in *brat* mutant brains. Error bars indicate s.d. \**P*<0.05 versus control (Student's *t*-test). See Fig. 2 for description of labels. Scale bars: 20  $\mu$ m.

– FlyBase), in either neuroblasts or Ase<sup>-</sup> immature INPs also suppressed the supernumerary neuroblast phenotype in *brat*<sup>DG19310/11</sup> brains (Fig. 5N,O,Q; *N*=10 per genotype). By contrast, overexpression of *Tcf<sup>DN</sup>* in Ase<sup>+</sup> immature INPs failed to suppress the supernumerary neuroblast phenotype in *brat*<sup>DG19310/11</sup> brains (Fig. 5P,Q; *N*=10). Thus, Brat specifies INP identity in Ase<sup>-</sup> immature INPs by attenuating Arm-activated gene transcription. Because increased Arm activity alone is not sufficient to induce supernumerary neuroblast formation (Fig. 4L), Wnt signaling promotes neuroblast identity in a context that is dependent on parallel mechanisms acting downstream of Brat.

#### Klu induces supernumerary neuroblast formation via an Arm-dependent mechanism

We previously showed that Brat specifies INP identity in Ase<sup>-</sup> immature INPs by antagonizing the neuroblast self-renewal factor Klu (Xiao et al., 2012). Thus, we tested whether Wnt signaling promotes neuroblast identity in a context dependent on Klu. Control clones derived from single type II neuroblasts overexpressing *klu* contained mostly supernumerary neuroblasts, whereas all *arm* mutant clones overexpressing *klu* consistently contained fewer supernumerary neuroblasts (Fig. 6A-D; *N*=10 clones). More specifically, ~50% of *arm* mutant clones overexpressing *klu*



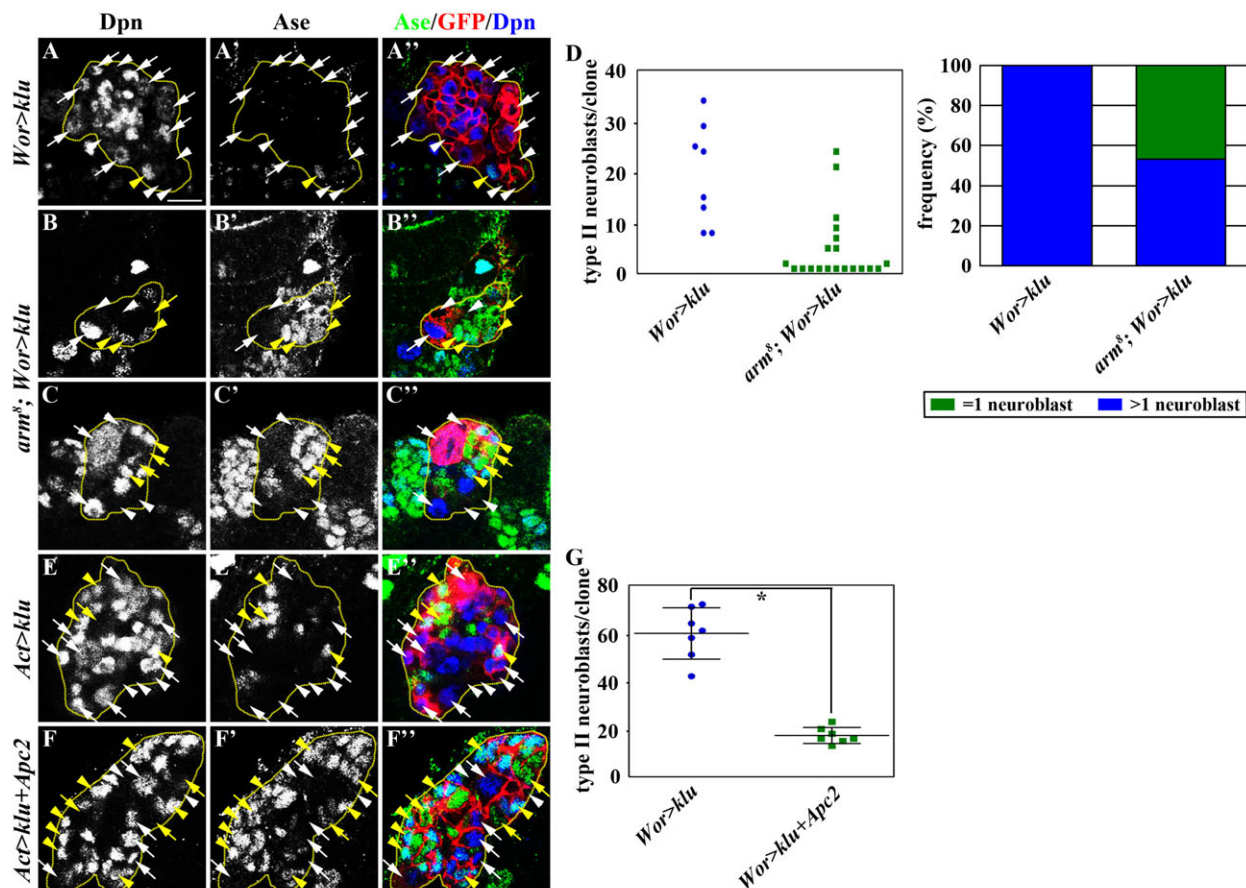

**Fig. 6. *arm* is required for the formation of supernumerary neuroblasts induced by overexpression of *klu*.** (A–C") The removal of *arm* function significantly reduces the formation of supernumerary neuroblasts induced by overexpression of *klu*. Larvae carrying GFP-positive type II neuroblast mosaic clones (outlined by the yellow dotted line) were aged for 72 hours after clone induction, and brains were stained for the markers indicated. (D) The frequency of clones containing one or more Dpn<sup>+</sup> type II neuroblasts in larvae of the genotype indicated. (E–F") Co-expression of *Apc2* suppresses supernumerary type II neuroblasts induced by overexpression of *klu*. (G) The total number of neuroblasts per clone in larvae of the genotype indicated. Error bars indicate s.d. \**P*<0.05 versus control (Student's *t*-test). See Fig. 2 for description of labels. Scale bars: 10  $\mu$ m.

contained greater than one neuroblast per clone, while the remaining *arm* mutant clones reproducibly possessed only one neuroblast per clone (Fig. 6B–D). Thus, these data strongly suggest that reducing the function of *arm* dampens the capacity of *klu* to induce supernumerary neuroblasts. Consistently, neuroblast clones co-expressing *Apc2* and *klu* also possessed far fewer supernumerary neuroblasts and more INPs than the control clones overexpressing *klu* alone (Fig. 6E–G). Because overexpression of *Apc2* alone did not affect the specification of cell identity in the type II neuroblast lineage (data not shown), these results indicate that increased *Apc2* function also dampens the capacity of *klu* to induce supernumerary neuroblasts. Taken together, we conclude that Arm functions in a Klu-dependent context to promote neuroblast identity.

## DISCUSSION

Asymmetric stem cell division provides an efficient mechanism to simultaneously self-renew a stem cell and to generate a progenitor cell that produces differentiated progeny. Because self-renewal proteins segregate into both daughter progeny of the dividing parental stem cell through the inheritance of its cytoplasmic content, rapidly downregulating the activity of these proteins is essential for the specification of progenitor cell identity. Brat plays a central role in specifying INP identity in the Ase<sup>−</sup> immature INP by antagonizing the function of the self-renewal transcription factor Klu (Xiao et al.,

2012). We have extended our previous findings to show that Brat specifies INP identity in the Ase<sup>−</sup> immature INP through two separable, but convergent, mechanisms. We identified a novel Brat-dependent mode of Wnt pathway regulation that prevents Ase<sup>−</sup> immature INPs from reverting into supernumerary neuroblasts. We showed that Brat specifies INP identity by attenuating the transcriptional activity of Arm through its N-terminal B-boxes (Fig. 2). This negative regulation of Arm is achieved through the activity of Apc2 and the destruction complex (Fig. 7). Because increased *arm* function alone was insufficient to induce supernumerary neuroblasts (Fig. 4H–J), the ability of Wnt signaling to promote neuroblast identity is dependent on other signaling mechanisms that act downstream of Brat. Indeed, Arm function is essential for Klu to induce supernumerary neuroblasts. These two Brat-regulated mechanisms function to safeguard against the accidental reversion of an uncommitted progenitor cell into a supernumerary stem cell and to ensure that an uncommitted progenitor cell can only adopt progenitor cell identity.

## Asymmetric protein segregation and asymmetric cell fate specification are mechanistically separable

Physical interaction with the cargo-binding domain of Mira is essential for the unequal segregation of Brat into the immature INP following the asymmetric division of neuroblasts (Betschinger et al.,



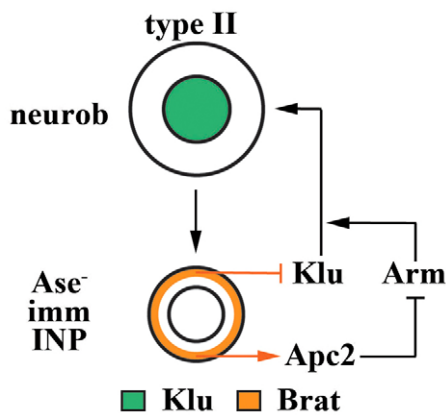

**Fig. 7. Model summarizing the mechanism by which Brat specifies INP identity by antagonizing both Klu and Arm function in immature INPs.** Brat specifies INP identity in Ase<sup>-</sup> immature INPs by antagonizing Arm function via an Apc2-dependent mechanism and repressing the activity of the self-renewal factor Klu. In the absence of *brat* function, the increased activity of *klu* and *arm* cooperatively induce the reversion of Ase<sup>-</sup> immature INPs into supernumerary type II neuroblasts.

2006; Lee et al., 2006a). Previous studies concluded that the NHL domain of Brat directly interacts with the cargo-binding domain of Mira, but the roles of the B-boxes and the coiled-coil domain in the asymmetric segregation of Brat were unknown due to a lack of specific mutant alleles. By combining a yeast two-hybrid interaction assay and *in vivo* functional validation, we conclude that both the coiled-coil domain and the NHL domain are indeed required for the asymmetric segregation of Brat into the Ase<sup>-</sup> immature INP following the asymmetric division of neuroblasts (Fig. 1). We speculate that the coiled-coil domain and the NHL domain of Brat function cooperatively to provide a more stable binding platform for Mira to ensure efficient protein segregation.

The severity of the supernumerary neuroblast phenotype in various *brat* mutant allelic combinations correlates with the level of endogenous *brat* inherited by the Ase<sup>-</sup> immature INP. The *brat*<sup>DG19310</sup> mutation carries a transposable P-element inserted in the 5' regulatory region of the *brat* gene (<http://flybase.org/reports/FBa0215708.html>). The *brat*<sup>11</sup> mutation, however, results in a premature stop codon at amino acid 779, leading to a truncated form of the protein that lacks most of the NHL domain and is predicted to be unable to interact with Mira (Arama et al., 2000; Napolitano and Meroni, 2012). The *brat*<sup>DG19310</sup> or *brat*<sup>DG19310/11</sup> allelic combination most likely reduces Brat expression without affecting its binding to Mira. Thus, the minimal threshold of Brat necessary for the proper specification of INP identity in Ase<sup>-</sup> immature INPs is met most of the time, leading to a mild supernumerary neuroblast phenotype in *brat*<sup>DG19310</sup> or *brat*<sup>DG19310/11</sup> brains (supplementary material Fig. S2A,B). By contrast, the *brat*<sup>11</sup> homozygous or *brat*<sup>11/Df</sup> mutant allelic combination impairs the binding of Brat to Mira, rendering the Mira-based asymmetric protein-sorting mechanism unable to segregate Brat into the Ase<sup>-</sup> immature INP. As such, the threshold of Brat necessary for proper specification of INP identity in Ase<sup>-</sup> immature INPs is rarely met, leading to a severe supernumerary neuroblast phenotype in *brat*<sup>11</sup> or *brat*<sup>11/Df</sup> brains (Fig. 2C,L). Overexpression of the *brat*<sup>ΔC-coil</sup> or *brat*<sup>ΔNHL</sup> transgene using the *UAS/Gal4* system almost certainly results in an abnormally high level of the transgenic protein in the cytoplasm of neuroblasts. Thus, inheriting a portion of the neuroblast cytoplasm containing an overwhelming abundance of the mutant transgenic protein is likely to be sufficient to reach the threshold of Brat

necessary for proper specification of INP identity in Ase<sup>-</sup> immature INPs. We conclude that the mechanism that causes Brat to asymmetrically segregate into the Ase<sup>-</sup> immature INP is functionally separable from the mechanism that specifies INP identity.

Could the asymmetric protein segregation mechanism promote the specification of INP identity by depleting Brat from the neuroblast? Type II neuroblasts overexpressing *brat*, *brat*<sup>ΔC-coil</sup> or *brat*<sup>ΔNHL</sup> maintained their identity and generated similar numbers of progeny as wild-type control neuroblasts (supplementary material Fig. S3). Thus, it is unlikely that Brat-dependent specification of INP identity occurs through asymmetric depletion of Brat from the neuroblast. We also tested whether Brat acts redundantly with other asymmetrically segregating determinants to specify INP identity in Ase<sup>-</sup> immature INPs. Numb also exclusively segregates into the immature INP during asymmetric divisions of type II neuroblasts (Haenfler et al., 2012). However, asymmetric segregation of Numb is not dependent on Brat, and Numb-dependent specification of INP identity also occurs independently of Brat (supplementary material Fig. S4). Thus, it is unlikely that Brat acts redundantly with other asymmetric segregating determinants to specify INP identity in Ase<sup>-</sup> immature INPs.

### The B-boxes function uniquely to promote Brat-dependent specification of INP identity

A surprising finding revealed by the current study is that the B-boxes are uniquely required for the specification of INP identity. This raises a series of interesting questions. What are the roles of B-boxes in the function of Brat in embryonic neuroblasts? Embryos lacking both maternal and zygotic function of *brat* often lack RP2 neurons but never possess supernumerary neuroblasts (Betschinger et al., 2006). Since *brat* mutant alleles that specifically affect the function of B-boxes are unavailable, the roles of B-boxes in the function of Brat during the asymmetric division of embryonic neuroblasts remain unknown. Brat regulates embryonic pattern formation by repressing mRNA translation through the ternary complex that also contains Nanos and Pumilio (Sonoda and Wharton, 2001). However, it is unlikely that Brat specifies INP identity through the Nanos-Pumilio-Brat translational repression complex for the following reasons. First, the NHL domain of Brat is required for binding to Pumilio and Nanos and for the assembly of the translational repressor complex (Sonoda and Wharton, 2001). However, the NHL domain is dispensable for Brat-dependent specification of INP identity (Fig. 2). Second, Nanos expression is undetectable in larval brains, and *pumilio* mutant larval brains do not possess supernumerary type II neuroblasts (data not shown). Together, these results are consistent with our conclusion that Brat specifies INP identity via a novel Arm-mediated mechanism.

The amino acid sequence of the B-boxes is highly conserved among all TRIM family proteins, including Brat, and is predicted to adopt a 'RING-like' fold tertiary structure (Massiah et al., 2006; Massiah et al., 2007; Tao et al., 2008). The RING-like fold might facilitate protein-protein interactions (Massiah et al., 2006; Massiah et al., 2007; Napolitano and Meroni, 2012). This is a particularly intriguing hypothesis in light of the fact that Apc2 and Brat both localize to the basal cortex in type II neuroblasts, and overexpression of *brat*, but not *brat*<sup>ΔB-boxes</sup>, can restore Apc2 protein localization in neuroblasts (Fig. 3). However, we were unable to co-immunoprecipitate epitope-tagged Brat and endogenous Apc2 from the brain lysate extracted from *brat* null mutant larvae overexpressing a Myc-tagged Brat transgenic protein (data not shown). Thus, Brat might maintain Apc2 protein localization indirectly through other factors. Future biochemical analyses of the

Brat protein and identification of the proteins that directly interact with the B-boxes will provide insight into how Brat controls Apc2 localization.

### Brat specifies INP identity by downregulating Arm activity via Apc2 and the destruction complex

The destruction complex targets  $\beta$ -catenin/Arm for degradation during canonical Wnt signaling, so reduced function of the destruction complex will lead to an increase in  $\beta$ -catenin/Arm, which forms a complex with Tcf/LEF family transcription factors to activate Wnt target gene expression (Aoki and Taketo, 2007; MacDonald et al., 2009; Niehrs, 2012). Our study led us to conclude that the Brat-Apc2 mechanism specifies INP identity by preventing aberrant activation of Wnt target gene expression in Ase<sup>-</sup> immature INPs (Figs 4, 5). We tested the role of the Wnt ligand in the Brat-dependent specification of INP identity by removing the function of the Wnt ligand using a temperature-sensitive mutant allele or by overexpressing a dominant-negative form of Frizzled (Fz<sup>DN</sup> or GPI-dFz2) in *brat*<sup>DG19310/11</sup> mutant brains. Interestingly, neither of these manipulations modified the supernumerary neuroblast phenotype in the sensitized *brat* genetic background (data not shown). These results suggest that the Wnt ligand and its receptor Fz are irrelevant in the Brat-dependent specification of INP identity and that the Brat-Apc2 mechanism prevents Wnt target gene expression in Ase<sup>-</sup> immature INPs by negatively regulating the activity of Arm. However, our data do not exclude the possibility that a novel activating mechanism of Wnt signaling might be present in type II neuroblasts in *Drosophila* larval brains.

We also sought to directly demonstrate that loss of *brat* function indeed leads to derepression of Wnt target gene expression in supernumerary neuroblasts. We examined the expression of two distinct Wnt reporter transgenes, *WRE-lacZ* and *Notum-lacZ* (Chang et al., 2008) in *brat* mutant brains. However, we were unable to detect the expression of these transgenes in supernumerary neuroblasts in *brat* null mutant brains (data not shown). Because genetic manipulations altering the activity of Arm efficiently modify the supernumerary neuroblast phenotype in *brat* mutant brains, these two transgenes are unlikely to have the necessary regulatory elements to reflect Wnt target gene activity in this tissue. Thus, we propose that the Brat-Apc2 mechanism specifies INP identity by antagonizing the transcriptional activity of Arm in Ase<sup>-</sup> immature INPs via a receptor-independent mechanism.

### Wnt signaling plays a permissive role in regulating the functional output of the self-renewal factor Klu in uncommitted intermediate progenitor cells

Wnt signaling regulation plays key roles in both stem cell renewal and the differentiation of progenitor cell types (Merrill, 2012; Habib et al., 2013). In the mammalian intestinal epithelium, for example, loss of Apc and activation of Wnt signaling results in the maintenance of stem cell properties in the progenitor cells, a failure to differentiate, and the production of intestinal polyps that progress to malignant tumors (Schwitalla et al., 2013). In the intestine, the inappropriate activation of Wnt signaling is sufficient to elicit stem cell properties. In the progenitor cells of larval type II neuroblasts, the activation of Wnt signaling alone, through either the expression of stabilized Arm (Fig. 4) or the loss of Apc2 (data not shown), does not drive stem cell renewal in otherwise wild-type immature INPs. In this system, Brat is the key regulator attenuating self-renewal through two independent, but convergent, mechanisms in its regulation of both Klu and Wnt signaling. Although Arm activity is required for Klu-dependent self-renewal in immature INPs (Fig. 6), its inability to promote self-

renewal alone suggests that Wnt signaling is likely to be playing a permissive role rather than an instructive role in eliciting the neuroblast identity. We propose that Brat downregulates the function of Klu through both Arm-dependent and -independent mechanisms (Fig. 7). Previous studies have demonstrated that TRIM32 and TRIM3, which are vertebrate orthologs of Brat, are essential regulators of neural stem cells during brain development and brain tumor formation (Boulay et al., 2009; Schwamborn et al., 2009). It will be interesting to test whether TRIM32 and TRIM3 regulate neural stem cells via a  $\beta$ -catenin-dependent mechanism.

## MATERIALS AND METHODS

### Fly genetics and transgenes

We used Oregon R as the wild-type control and the following mutant alleles: *brat*<sup>k06028</sup>, *brat*<sup>fs1</sup> and *brat*<sup>l1</sup> (Arama et al., 2000), *brat*<sup>DG19310</sup> (Xiao et al., 2012), *Apc2*<sup>N175K</sup> (Hamada and Bienz, 2002), *Apc2*<sup>d40</sup> (McCartney et al., 2001), *Apc2*<sup>g10</sup> (McCartney et al., 2006), *Apc1*<sup>Q8</sup> (Ahmed et al., 1998), *arm*<sup>8</sup> (Peifer and Wieschaus, 1990), *Axin*<sup>S044230</sup> (Tolwinski and Wieschaus, 2001), *CKIa*<sup>8B12</sup> (Legent et al., 2012), *sgg*<sup>8E22</sup> (Legent et al., 2012), *wg*<sup>CX4</sup> (Baker, 1987), *wg*<sup>fs</sup> (Bejsovec and Martinez Arias, 1991), *Nanos-GAL4* (Van Doren et al., 1998), *UAS-Apc2-GFP* (Akong et al., 2002), *UAS-arm*<sup>S10</sup> (Pai et al., 1997), *UAS-GPI-dfz2* (Rulifson et al., 2000), *UAS-dTcf*<sup>AN</sup> (van de Wetering et al., 1997), *Wor-GAL4* (Lee et al., 2006b), *Elav-GAL4* (*C155*) (Brand and Perrimon, 1993), *Act-FRT-CD2-FRT-GAL4* (Pignoni and Zipursky, 1997), *pum*<sup>Msc</sup> (Lehmann and Nusslein-Volhard, 1987), *pum*<sup>l3</sup> (Lehmann and Nusslein-Volhard, 1987), *WRE-lacZ* and *Notum-lacZ* (Chang et al., 2008). The following stocks were obtained from the Bloomington *Drosophila* Stock Center: *hs-flp*, *UAS-mCD8-GFP*, *FRT40A*, *tub-gal80*, *FRT82B*, *FRT19A*, *Df(2L)Exel8040* and *UAS-GFP*.

The following transgenic lines were generated in this study: *UAS-brat-myc*, *UAS-brat*<sup>AB-boxes</sup>-*myc*, *UAS-brat*<sup>AB-box 1</sup>-*myc*, *UAS-brat*<sup>AB-box 2</sup>-*myc*, *UAS-brat*<sup>AC-coil</sup>-*myc* and *UAS-brat*<sup>ANHL</sup>-*myc*. The cDNA was cloned into p{UAST}attB vector and the transgenic fly lines were generated via  $\phi$ C31 integrase-mediated transgenesis (Bischof et al., 2007).

### Immunofluorescent staining and antibodies

Larval brains were dissected in Schneider's medium (Sigma) and fixed in 100 mM PIPES (pH 6.9), 1 mM EGTA, 0.3% Triton X-100, 1 mM MgSO<sub>4</sub> containing 4% formaldehyde for 23 minutes. We have empirically determined that fixation for 23 minutes allows us to obtain the most robust signal-to-noise ratio to visualize larval brain neuroblasts stained with the Dpn and Ase antibodies. Larval brains were then washed for 20 minutes in 1× PBS containing 0.3% Triton X-100 (PBST) and incubated in primary antibodies diluted in PBST for 3 hours at room temperature. Antibodies used include guinea pig anti-Ase (1:100), rat anti-Dpn (1:2), rabbit anti-Ase (1:400), rat anti-Mira (1:100), mouse anti-Prospero (MR1A; 1:100), mouse anti-Elav (1:50; DSHB, 9F8A9), mouse anti- $\beta$ -gal (1:100; Sigma, G4644), mouse anti-phosphohistone H3 (1:2000; Upstate Biotechnology, 06-570), chicken anti-GFP (1:2000; Aves Labs, GF-1020), rabbit anti-Scrib (1:2500), rabbit anti-Apc2 (1:100; Y. Yamashita, University of Michigan, Ann Arbor, MI, USA), rabbit anti-cMyc (1:200; Santa Cruz, sc-789), guinea pig anti-Numb (1:2500; J. Skeath, Washington University, St Louis, MO, USA) and rabbit anti-Nos (1:2000; Y. Tao and D. Chen, Chinese Academy of Sciences, China). Species-specific fluorophore-conjugated secondary antibodies (Jackson ImmunoResearch, 703-545-155, 112-605-167; Life Technologies, A-11034, A-11035, A-11074, A31553, A-31556) were used at 1:500. We used Rhodamine phalloidin (Invitrogen) to visualize cortical actin. The confocal images were acquired on a Leica SP5 scanning confocal microscope.

### Yeast two-hybrid interaction assay

The bait comprising full-length Brat, Brat<sup>AB-boxes</sup> or Brat<sup>AC-coil</sup> was PCR amplified and cloned into the LexA DNA-binding domain cloning vector. Brat<sup>ANHL</sup> was excluded from the screen due to excessive auto-activation. The prey comprising Mira<sup>369-506</sup> or Mira<sup>527-638</sup> was cloned into the Gal4 activation domain cloning vector. All constructs were checked by



sequencing. The bait and prey constructs were transformed, respectively, into L40ΔGal4 (mata) and Y187 (matα) haploid yeast cells. Interaction pairs were tested in duplicate, as two independent clones from each mating were picked for the growth assay. The clones were tested for their growth as calibrated drops to provide a qualitative measurement of the affinity and a comparison between the various assays. For each interaction, several dilutions ( $10^{-1}$ ,  $10^{-2}$ ,  $10^{-3}$  and  $10^{-4}$ ) of the diploid yeast cells (culture normalized at  $5 \times 10^4$  cells) and cells expressing both bait and prey constructs were spotted on several selective media. The DO-2 selective medium lacking tryptophan and leucine was used as a growth control and to verify the presence of both the bait and prey plasmids. The different dilutions were also spotted on a selective medium without tryptophan, leucine and histidine (DO-3). Four different concentrations of 3A-T (1, 5, 10 and 50 mM; Sigma), an inhibitor of the *HIS3* gene product, were added to the DO-3 plates to increase stringency and reduce possible auto-activation by Brat or its variants.

### Identification of type II neuroblasts

Type II neuroblasts were identified by a combination of molecular marker expression ( $\text{Dpn}^+ \text{Ase}^-$ ) and their location on the dorsal surface of the larval brain lobe (Bello et al., 2008; Boone and Doe, 2008; Bowman et al., 2008).

### Clonal analyses

Clones were induced following published methods (Lee and Luo, 2001; Weng et al., 2010).

### Real-time PCR

Late third instar larval brains were dissected free of surrounding tissues. Total RNA was extracted following the standard Trizol RNA isolation protocol and cleaned using the Qiagen RNeasy Kit. cDNA was reverse transcribed using the First Strand cDNA Synthesis Kit for RT-PCR (AMV) (Roche). Quantitative PCR was performed using Absolute QPCR SYBR Green ROX Mix (Thermo Scientific). Resulting data were analyzed by the comparative CT method, and relative mRNA expression is presented.

### Western blot

Proteins were extracted from late third instar larval brains. Cell lysates separated by SDS-PAGE were blotted onto an Immobilon transfer membrane (Millipore) and then incubated with antibodies to Apc2 (1:1000) or  $\alpha$ -tubulin (1:5000; Sigma, T6199). Blots were incubated with HRP-conjugated secondary antibodies (Millipore) and proteins were detected by Pierce ECL Western Blotting Substrate according to the manufacturer's protocol.

### Acknowledgements

We thank Drs Y. Ahmed, K. Cadigan, D. Chen, C. Doe, J. Skeath, Y. Tao, J. Treisman, R. Xi and Y. Yamashita for fly stocks and antibody reagents; the Bloomington *Drosophila* Stock Center and the Vienna *Drosophila* RNAi Center for fly stocks; the *Drosophila* Genomics Resource Center for the *brat* cDNA clone; BestGene for generating the transgenic fly lines; Hybrigenics for performing the yeast two-hybrid interaction assays; and the members of the C.-Y.L. laboratory for reading the manuscript and providing critical comments.

### Competing interests

The authors declare no competing financial interests.

### Author contributions

H.K., Q.X. and C.-Y.L. designed experiments. H.K. and Q.X. performed experiments. H.K., Q.X. and C.-Y.L. analyzed and interpreted data. H.K., Q.X., B.M.M. and C.-Y.L. wrote the manuscript.

### Funding

H.K. was supported by a fellowship from the Japan Society for the Promotion of Science. C.-Y.L. is supported by a National Institutes of Health grant [R01NS077914]. Deposited in PMC for release after 12 months.

### Supplementary material

Supplementary material available online at <http://dev.biologists.org/lookup/suppl/doi:10.1242/dev.099382/-/DC1>

### References

- Ahmed, Y., Hayashi, S., Levine, A. and Wieschaus, E. (1998). Regulation of armadillo by a *Drosophila* APC inhibits neuronal apoptosis during retinal development. *Cell* **93**, 1171-1182.
- Ahmed, Y., Nouri, A. and Wieschaus, E. (2002). *Drosophila* Apc1 and Apc2 regulate Wingless transduction throughout development. *Development* **129**, 1751-1762.
- Akong, K., McCartney, B. M. and Peifer, M. (2002). *Drosophila* APC2 and APC1 have overlapping roles in the larval brain despite their distinct intracellular localizations. *Dev. Biol.* **250**, 71-90.
- Aoki, K. and Taketo, M. M. (2007). Adenomatous polyposis coli (APC): a multifunctional tumor suppressor gene. *J. Cell Sci.* **120**, 3327-3335.
- Arama, E., Dickman, D., Kimchie, Z., Shearn, A. and Lev, Z. (2000). Mutations in the beta-propeller domain of the *Drosophila* brain tumor (brat) protein induce neoplasm in the larval brain. *Oncogene* **19**, 3706-3716.
- Baker, N. (1987). Molecular cloning of sequences from wingless a segment polarity gene in *Drosophila* the spatial distribution of a transcript in embryos. *EMBO J.* **6**, 1765-1774.
- Bayraktar, O. A., Boone, J. Q., Drummond, M. L. and Doe, C. Q. (2010). *Drosophila* type II neuroblast lineages keep Prospero levels low to generate large clones that contribute to the adult brain central complex. *Neural Dev.* **5**, 26.
- Bejsovec, A. and Martinez Arias, A. (1991). Roles of wingless in patterning the larval epidermis of *Drosophila*. *Development* **113**, 471-485.
- Bello, B. C., Izergina, N., Caussinus, E. and Reichert, H. (2008). Amplification of neural stem cell proliferation by intermediate progenitor cells in *Drosophila* brain development. *Neural Dev.* **3**, 5.
- Betschinger, J., Mechtler, K. and Knoblich, J. A. (2006). Asymmetric segregation of the tumor suppressor brat regulates self-renewal in *Drosophila* neural stem cells. *Cell* **124**, 1241-1253.
- Bischof, J., Maeda, R. K., Hediger, M., Karch, F. and Basler, K. (2007). An optimized transgenesis system for *Drosophila* using germ-line-specific phiC31 integrases. *Proc. Natl. Acad. Sci. USA* **104**, 3312-3317.
- Boone, J. Q. and Doe, C. Q. (2008). Identification of *Drosophila* type II neuroblast lineages containing transit amplifying ganglion mother cells. *Dev. Neurobiol.* **68**, 1185-1195.
- Boulay, J. L., Stiefel, U., Taylor, E., Dolder, B., Merlo, A. and Hirth, F. (2009). Loss of heterozygosity of TRIM3 in malignant gliomas. *BMC Cancer* **9**, 71.
- Bowman, S. K., Rolland, V., Betschinger, J., Kinsey, K. A., Emery, G. and Knoblich, J. A. (2008). The tumor suppressors Brat and Numb regulate transit-amplifying neuroblast lineages in *Drosophila*. *Dev. Cell* **14**, 535-546.
- Brand, A. H. and Perrimon, N. (1993). Targeted gene expression as a means of altering cell fates and generating dominant phenotypes. *Development* **118**, 401-415.
- Chang, J. L., Chang, M. V., Barolo, S. and Cadigan, K. M. (2008). Regulation of the feedback antagonist naked cuticle by Wingless signaling. *Dev. Biol.* **321**, 446-454.
- Habib, S. J., Chen, B. C., Tsai, F. C., Anastassiadis, K., Meyer, T., Betzig, E. and Nusse, R. (2013). A localized Wnt signal orients asymmetric stem cell division in vitro. *Science* **339**, 1445-1448.
- Haefliger, J. M., Kuang, C. and Lee, C. Y. (2012). Cortical aPKC kinase activity distinguishes neural stem cells from progenitor cells by ensuring asymmetric segregation of Numb. *Dev. Biol.* **365**, 219-228.
- Hamada, F. and Bienz, M. (2002). A *Drosophila* APC tumour suppressor homologue functions in cellular adhesion. *Nat. Cell Biol.* **4**, 208-213.
- Harris, R. E., Pargett, M., Sutcliffe, C., Umulis, D. and Ashe, H. L. (2011). Brat promotes stem cell differentiation via control of a bistable switch that restricts BMP signaling. *Dev. Cell* **20**, 72-83.
- Homem, C. C. and Knoblich, J. A. (2012). *Drosophila* neuroblasts: a model for stem cell biology. *Development* **139**, 4297-4310.
- Krivtsov, A. V., Twomey, D., Feng, Z., Stubbs, M. C., Wang, Y., Faber, J., Levine, J. E., Wang, J., Hahn, W. C., Gilliland, D. G. et al. (2006). Transformation from committed progenitor to leukaemia stem cell initiated by MLL-AF9. *Nature* **442**, 818-822.
- Lee, C. Y., Wilkinson, B. D., Siegrist, S. E., Wharton, R. P. and Doe, C. Q. (2006a). Brat is a Miranda cargo protein that promotes neuronal differentiation and inhibits neuroblast self-renewal. *Dev. Cell* **10**, 441-449.
- Lee, C. Y., Robinson, K. J. and Doe, C. Q. (2006b). Lgl, Pins and aPKC regulate neuroblast self-renewal versus differentiation. *Nature* **439**, 594-598.
- Lee, T. and Luo, L. (2001). Mosaic analysis with a repressible cell marker (MARCM) for *Drosophila* neural development. *Trends Neurosci.* **24**, 251-254.
- Legent, K., Steinhauer, J., Richard, M. and Treisman, J. E. (2012). A screen for X-linked mutations affecting *Drosophila* photoreceptor differentiation identifies Casein kinase 1 $\alpha$  as an essential negative regulator of wingless signaling. *Genetics* **190**, 601-616.
- Lehmann, R. and Nusslein-Volhard, C. (1987). Involvement of the pumilio gene in the transport of an abdominal signal in the *Drosophila* embryo. *Nature* **329**, 167-170.
- Liu, C., Sage, J. C., Miller, M. R., Verhaak, R. G., Hippenmeyer, S., Vogel, H., Foreman, O., Bronson, R. T., Nishiyama, A., Luo, L. et al. (2011). Mosaic analysis with double markers reveals tumor cell of origin in glioma. *Cell* **146**, 209-221.
- MacDonald, B. T., Tamai, K. and He, X. (2009). Wnt/beta-catenin signaling: components, mechanisms, and diseases. *Dev. Cell* **17**, 9-26.
- Massiah, M. A., Simmons, B. N., Short, K. M. and Cox, T. C. (2006). Solution structure of the RBCC/TRIM B-box1 domain of human MID1: B-box with a RING. *J. Mol. Biol.* **358**, 532-545.
- Massiah, M. A., Matts, J. A., Short, K. M., Simmons, B. N., Singireddy, S., Yi, Z. and Cox, T. C. (2007). Solution structure of the MID1 B-box2 CHC(D/C)C(2)H(2) zinc-binding domain: insights into an evolutionarily conserved RING fold. *J. Mol. Biol.* **369**, 1-10.

- McCartney, B. M., Dierick, H. A., Kirkpatrick, C., Moline, M. M., Baas, A., Peifer, M. and Bejsovec, A. (1999). Drosophila APC2 is a cytoskeletally-associated protein that regulates wingless signaling in the embryonic epidermis. *J. Cell Biol.* **146**, 1303-1318.
- McCartney, B. M., McEwen, D. G., Grevengoed, E., Maddox, P., Bejsovec, A. and Peifer, M. (2001). Drosophila APC2 and Armadillo participate in tethering mitotic spindles to cortical actin. *Nat. Cell Biol.* **3**, 933-938.
- McCartney, B. M., Price, M. H., Webb, R. L., Hayden, M. A., Holot, L. M., Zhou, M., Bejsovec, A. and Peifer, M. (2006). Testing hypotheses for the functions of APC family proteins using null and truncation alleles in Drosophila. *Development* **133**, 2407-2418.
- Merrill, B. J. (2012). Wnt pathway regulation of embryonic stem cell self-renewal. *Cold Spring Harb. Perspect. Biol.* **4**, a007971.
- Ming, G. L. and Song, H. (2011). Adult neurogenesis in the mammalian brain: significant answers and significant questions. *Neuron* **70**, 687-702.
- Napolitano, L. M. and Meroni, G. (2012). TRIM family: Pleiotropy and diversification through homomultimer and heteromultimer formation. *IUBMB Life* **64**, 64-71.
- Neumüller, R. A., Betschinger, J., Fischer, A., Bushati, N., Poernbacher, I., Mechtler, K., Cohen, S. M. and Knoblich, J. A. (2008). Mei-P26 regulates microRNAs and cell growth in the Drosophila ovarian stem cell lineage. *Nature* **454**, 241-245.
- Niehrs, C. (2012). The complex world of WNT receptor signalling. *Nat. Rev. Mol. Cell Biol.* **13**, 767-779.
- Pai, L. M., Orsulic, S., Bejsovec, A. and Peifer, M. (1997). Negative regulation of Armadillo, a Wingless effector in Drosophila. *Development* **124**, 2255-2266.
- Peifer, M. and Wieschaus, E. (1990). The segment polarity gene armadillo encodes a functionally modular protein that is the Drosophila homolog of human plakoglobin. *Cell* **63**, 1167-1176.
- Pierfelice, T., Alberi, L. and Gaiano, N. (2011). Notch in the vertebrate nervous system: an old dog with new tricks. *Neuron* **69**, 840-855.
- Pignoni, F. and Zipursky, S. L. (1997). Induction of Drosophila eye development by decapentaplegic. *Development* **124**, 271-278.
- Rulifson, E. J., Wu, C. H. and Nusse, R. (2000). Pathway specificity by the bifunctional receptor frizzled is determined by affinity for wingless. *Mol. Cell* **6**, 117-126.
- Schwamborn, J. C., Berezikov, E. and Knoblich, J. A. (2009). The TRIM-NHL protein TRIM32 activates microRNAs and prevents self-renewal in mouse neural progenitors. *Cell* **136**, 913-925.
- Schwitalla, S., Fingerle, A. A., Cammareri, P., Nebelsiek, T., Göktuna, S. I., Ziegler, P. K., Canli, O., Heijmans, J., Huels, D. J., Moreaux, G. et al. (2013). Intestinal tumorigenesis initiated by dedifferentiation and acquisition of stem-cell-like properties. *Cell* **152**, 25-38.
- Song, Y. and Lu, B. (2011). Regulation of cell growth by Notch signaling and its differential requirement in normal vs. tumor-forming stem cells in Drosophila. *Genes Dev.* **25**, 2644-2658.
- Sonoda, J. and Wharton, R. P. (2001). Drosophila Brain Tumor is a translational repressor. *Genes Dev.* **15**, 762-773.
- Tao, H., Simmons, B. N., Singireddy, S., Jakkidi, M., Short, K. M., Cox, T. C. and Massiah, M. A. (2008). Structure of the MID1 tandem B-boxes reveals an interaction reminiscent of intermolecular ring heterodimers. *Biochemistry* **47**, 2450-2457.
- Tolwinski, N. S. and Wieschaus, E. (2001). Armadillo nuclear import is regulated by cytoplasmic anchor Axin and nuclear anchor dTCF/Pan. *Development* **128**, 2107-2117.
- van de Wetering, M., Cavallo, R., Dooijes, D., van Beest, M., van Es, J., Loureiro, J., Ypma, A., Hursh, D., Jones, T., Bejsovec, A. et al. (1997). Armadillo coactivates transcription driven by the product of the Drosophila segment polarity gene dTCF. *Cell* **88**, 789-799.
- Van Doren, M., Williamson, A. L. and Lehmann, R. (1998). Regulation of zygotic gene expression in Drosophila primordial germ cells. *Curr. Biol.* **8**, 243-246.
- Wei, J., Wunderlich, M., Fox, C., Alvarez, S., Cigudosa, J. C., Wilhelm, J. S., Zheng, Y., Cancelas, J. A., Gu, Y., Jansen, M. et al. (2008). Microenvironment determines lineage fate in a human model of MLL-AF9 leukemia. *Cancer Cell* **13**, 483-495.
- Weng, M. and Lee, C. Y. (2011). Keeping neural progenitor cells on a short leash during Drosophila neurogenesis. *Curr. Opin. Neurobiol.* **21**, 36-42.
- Weng, M., Golden, K. L. and Lee, C. Y. (2010). dFezf/Earmuff maintains the restricted developmental potential of intermediate neural progenitors in Drosophila. *Dev. Cell* **18**, 126-135.
- Xiao, Q., Komori, H. and Lee, C. Y. (2012). klumpfuss distinguishes stem cells from progenitor cells during asymmetric neuroblast division. *Development* **139**, 2670-2680.
